# Supplementary material for: In situ growth of ZnO nanorod arrays on cotton cloth for the removal of uranium(vi)
Source: Royal Society of Chemistry journal article supplement (doi:10.1039/c5ra08489j), 2015-01-01
Supplement: c5ra08489j1.pdf [file c5ra08489j1.pdf]

# Supporting Information

## **In situ growth ZnO nanorod arrays on cotton cloth for the removal of uranium (VI)**

Lei Zhang,<sup>a</sup> Liang Zhang,<sup>a</sup> Tianhao Wu,<sup>c</sup> Xiaoyan Jing,<sup>a</sup> Rumin Li,<sup>a</sup> Jingyuan Liu,<sup>a</sup> Qi Liu<sup>\*a</sup> and Jun Wang<sup>\*ab</sup>

<sup>a</sup> Key Laboratory of Superlight Material and Surface Technology, Ministry of Education, Harbin Engineering University, 150001, PR China.

<sup>b</sup> Institute of Advanced Marine Materials, Harbin Engineering University, 150001, PR China.

<sup>c</sup> Fundamental Science on Nuclear Safety and Simulation Technology Laboratory, Harbin Engineering University, 150001, PR China.

\* Corresponding author: Tel.: +86 451 8253 3026; Fax: +86 451 8253 3026; E-mail: zhqw1888@sohu.com.

**Tab S1** The change in weight of ZnO/CC after ultrasound.

| Number                                                         | ①     | ②     | ③     |
|----------------------------------------------------------------|-------|-------|-------|
| Weight of cotton cloth modified with zinc oxide seeded sol (g) | 0.037 | 0.039 | 0.034 |
| Weight of ZnO/CC (g)                                           | 0.049 | 0.051 | 0.048 |
| Weight of ZnO/CC after ultrasound (g)                          | 0.047 | 0.050 | 0.046 |

**Tab.S2** Comparison of saturated adsorption capacity in the parallel experiment (m=0.010g, C<sub>0</sub>=250.00 mg L<sup>-1</sup>, pH=5.0, T=298K)

|                              | Q <sub>e</sub> (mg g <sup>-1</sup> ) |
|------------------------------|--------------------------------------|
| Pure cotton cloth            | 35.21 (±0.50)                        |
| ZnO/CC grown without seeding | 87.60 (±0.50)                        |
| ZnO/CC                       | 428.76 (±0.50)                       |

**Tab S3** Isotherm parameters for the adsorption uranium (VI) onto ZnO/CC.

| Langmuir constants |                                      |                                     |                | Freundlich constants                               |       |                |
|--------------------|--------------------------------------|-------------------------------------|----------------|----------------------------------------------------|-------|----------------|
| T (K)              | Q <sub>m</sub> (mg g <sup>-1</sup> ) | K <sub>L</sub> (L g <sup>-1</sup> ) | R <sup>2</sup> | K <sub>F</sub> (L g <sup>-1</sup> ) <sup>1/n</sup> | 1/n   | R <sup>2</sup> |
| 298                | 431.03                               | 1.79                                | 0.99           | 340.32                                             | 0.050 | 0.77           |
| 308                | 444.44                               | 1.79                                | 0.99           | 350.21                                             | 0.051 | 0.85           |
| 318                | 460.83                               | 2.68                                | 0.99           | 373.56                                             | 0.047 | 0.88           |
| 328                | 476.19                               | 3.31                                | 0.99           | 399.65                                             | 0.093 | 0.95           |

**Tab S4** Thermodynamic parameter for uranium adsorption on ZnO/CC.

| ΔH <sup>0</sup> (kJ mol <sup>-1</sup> ) | ΔS <sup>0</sup> (J mol <sup>-1</sup> ·K <sup>-1</sup> ) | ΔG <sup>0</sup> (kJ mol <sup>-1</sup> ) |       |       |       |
|-----------------------------------------|---------------------------------------------------------|-----------------------------------------|-------|-------|-------|
|                                         |                                                         | 298 K                                   | 308 K | 318 K | 328 K |
| 20.26                                   | 86.98                                                   | -5.66                                   | -6.53 | -7.40 | -8.27 |

**Tab S5** Kinetic parameters of different models for uranium (VI) adsorption onto ZnO/CC.

| Kinetic model       | T(K) | C <sub>0</sub> (mg L <sup>-1</sup> ) | Q <sub>cal</sub> (mg g <sup>-1</sup> ) | k <sub>1</sub> (min <sup>-1</sup> )                      | R <sup>2</sup> |
|---------------------|------|--------------------------------------|----------------------------------------|----------------------------------------------------------|----------------|
|                     |      |                                      |                                        | k <sub>2</sub> (g · mg <sup>-1</sup> min <sup>-1</sup> ) |                |
| Pseudo-first-order  | 298  | 200.00                               | 487.01                                 | 0.13340                                                  | 0.91           |
| Pseudo-second-order | 298  | 200.00                               | 453.55                                 | 0.00032                                                  | 0.99           |

**Tab. S6** The maximum adsorption capacity of different adsorbents for uranium (VI).

| Adsorbents                                                       | Conditions                                                                                                                   | Maximum adsorption capacity              | Ref.     |
|------------------------------------------------------------------|------------------------------------------------------------------------------------------------------------------------------|------------------------------------------|----------|
| Functionalized carbon spheres                                    | $C_{\text{initial}}=1-100 \text{ mg L}^{-1}$<br>pH=4.0                                                                       | 113.16 $\text{mg g}^{-1}$                | [38]     |
| CoFe <sub>2</sub> O <sub>4</sub> hollow spheres                  | $C_{\text{initial}}=20-140 \text{ mg L}^{-1}$<br>T=298 K pH=6.0                                                              | 170.07 $\text{mg g}^{-1}$                | [39]     |
| Magnetic yolk-shell iron oxide @ magnesium silicate microspheres | $C_e=1 \times 10^{-6}-2 \times 10^{-5} \text{ mol L}^{-1}$<br>T=318 K pH=5.5<br>$C [\text{NaClO}_4]=0.01 \text{ mol L}^{-1}$ | $1.51 \times 10^{-5} \text{ mol g}^{-1}$ | [40]     |
| Graphene oxide-supported chitosan                                | $C_{\text{initial}}=10-60 \text{ mg L}^{-1}$<br>T=303 K pH=4.0                                                               | 225.78 $\text{mg g}^{-1}$                | [41]     |
| Mg <sub>2</sub> CO <sub>3</sub> (OH) <sub>2</sub> /CC            | $C_{\text{initial}}=20-220 \text{ mg L}^{-1}$<br>T=298K pH=5.0                                                               | 370 $\text{mg g}^{-1}$                   | [10]     |
| Hydrothermal carbon                                              | $C_{\text{initial}}=10-90 \text{ mg L}^{-1}$<br>T=298 K pH=7.92                                                              | 273 $\text{mg g}^{-1}$                   | [42]     |
| CaAl double hydroxides                                           | $C_{\text{initial}}=10-500 \text{ mg L}^{-1}$<br>T=298 K pH=6.0                                                              | 257 $\text{mg g}^{-1}$                   | [43]     |
| Nanoporous ZnO by microwave-assisted                             | $C_{\text{initial}}=20-80 \text{ mg L}^{-1}$<br>T=303 K pH=5.0                                                               | 1111 $\text{mg g}^{-1}$                  | [22]     |
| 1.0PANI/GO                                                       | $C_{\text{eq}}=0-80 \text{ mg L}^{-1}$<br>T=293 K pH=5.0<br>$C [\text{NaCl}] = 0.01 \text{ mol L}^{-1}$                      | 1960 $\text{mg g}^{-1}$                  | [44]     |
| ZnO/CC                                                           | $C_{\text{initial}}=100-350 \text{ mg L}^{-1}$<br>T=298 K pH=5.0                                                             | 431.03 $\text{mg g}^{-1}$                | Our work |

**Tab. S7** The analyzed and calculated concentrations of zinc (II) at different contact times.

| Different contact time (min)                  | 10    | 20    | 30    | 40    |
|-----------------------------------------------|-------|-------|-------|-------|
| $C [\text{Zn}^{2+}] (\text{mg L}^{-1})$       | 14.37 | 19.13 | 21.31 | 22.03 |
| $n [\text{Zn}^{2+}+2\text{H}^+] (\text{mol})$ | 0.611 | 0.814 | 0.907 | 0.921 |

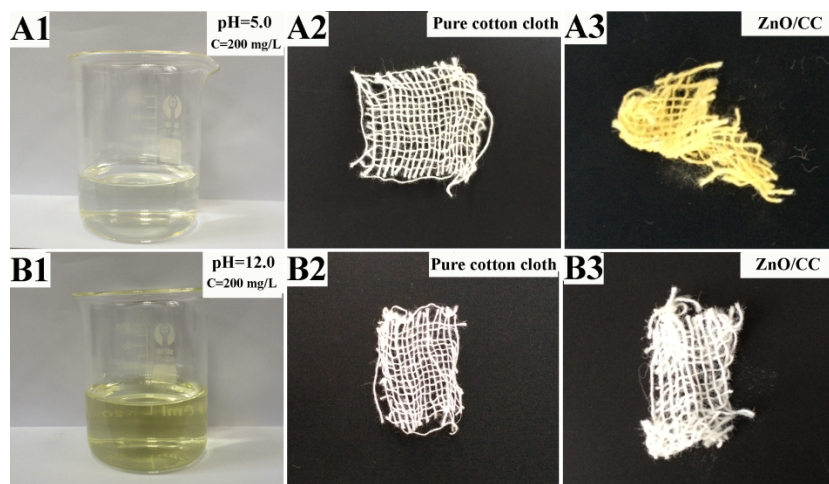

**Fig. S1** The change in color of pure cotton cloth and ZnO/CC at different pH.

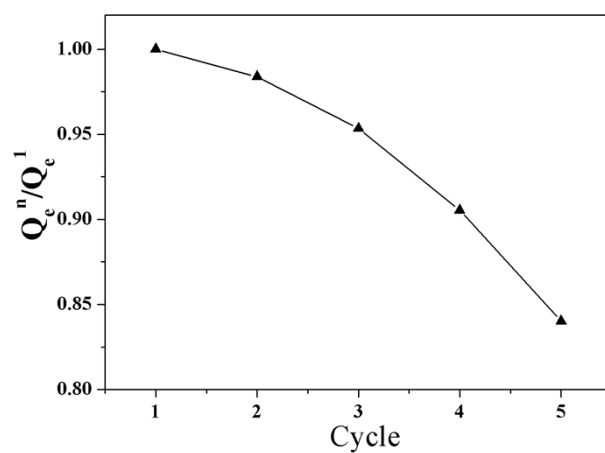

**Fig. S2** The adsorption capacity with the reuse cycle.
